# Supplementary material for: Variability and conservation in hepatitis B virus core protein
Source: PubMed Central journal article supplement (PMC1173110; doi:10.1186/1471-2180-5-33), 2005-05-27
Supplement: 1471-2180-5-33-S1.pdf [file 1471-2180-5-33-S1.pdf]

| Position | A | C | D | E | F | G | H | I | K | L | M | N | P | Q | R | S | T | V | W | Y | GAP | SUM |
|----------|---|---|---|---|---|---|---|---|---|---|---|---|---|---|---|---|---|---|---|---|-----|-----|
| 1        | M |   |   |   |   |   |   |   |   |   |   |   |   |   |   |   |   |   |   |   |     | 1 M |
| 2        | D |   |   |   |   |   |   |   |   |   |   |   |   |   |   |   |   |   |   |   |     | 1 D |
| 3        | I |   |   |   |   |   |   |   |   |   |   |   |   |   |   |   |   |   |   |   |     | 1 I |
| 4        | D |   |   |   |   |   |   |   |   |   |   |   |   |   |   |   |   |   |   |   |     | 1 D |
| 5        | P |   |   |   |   |   |   |   |   |   |   |   |   |   |   |   |   |   |   |   |     | 2 P |
| 6        | Y |   |   |   |   |   |   |   |   |   |   |   |   |   |   |   |   |   |   |   |     | 1 Y |
| 7        | K |   |   |   |   |   |   |   |   |   |   |   |   |   |   |   |   |   |   |   |     | 1 K |
| 8        | E |   |   |   |   |   |   |   |   |   |   |   |   |   |   |   |   |   |   |   |     | 1 E |
| 9        | F |   |   |   |   |   |   |   |   |   |   |   |   |   |   |   |   |   |   |   |     | 1 F |
| 10       | G |   |   |   |   |   |   |   |   |   |   |   |   |   |   |   |   |   |   |   |     | 1 G |
| 11       | A |   |   |   |   |   |   |   |   |   |   |   |   |   |   |   |   |   |   |   |     | 1 A |
| 12       | S |   |   |   |   |   |   |   |   |   |   |   |   |   |   |   |   |   |   |   |     | 2 S |
| 13       | V |   |   |   |   |   |   |   |   |   |   |   |   |   |   |   |   |   |   |   |     | 2 V |
| 14       | E |   |   |   |   |   |   |   |   |   |   |   |   |   |   |   |   |   |   |   |     | 1 E |
| 15       | L |   |   |   |   |   |   |   |   |   |   |   |   |   |   |   |   |   |   |   |     | 1 L |
| 16       | L |   |   |   |   |   |   |   |   |   |   |   |   |   |   |   |   |   |   |   |     | 1 L |
| 17       | S |   |   |   |   |   |   |   |   |   |   |   |   |   |   |   |   |   |   |   |     | 1 S |
| 18       | F |   |   |   |   |   |   |   |   |   |   |   |   |   |   |   |   |   |   |   |     | 1 F |
| 19       | L |   |   |   |   |   |   |   |   |   |   |   |   |   |   |   |   |   |   |   |     | 1 L |
| 20       | P |   |   |   |   |   |   |   |   |   |   |   |   |   |   |   |   |   |   |   |     | 1 P |
| 21       | S |   |   |   |   |   |   |   |   |   |   |   |   |   |   |   |   |   |   |   |     | 3 S |
| 22       | D |   |   |   |   |   |   |   |   |   |   |   |   |   |   |   |   |   |   |   |     | 1 D |
| 23       | F |   |   |   |   |   |   |   |   |   |   |   |   |   |   |   |   |   |   |   |     | 1 F |
| 24       | F |   |   |   |   |   |   |   |   |   |   |   |   |   |   |   |   |   |   |   |     | 1 F |
| 25       | P |   |   |   |   |   |   |   |   |   |   |   |   |   |   |   |   |   |   |   |     | 1 P |
| 26       | S |   |   |   |   |   |   |   |   |   |   |   |   |   |   |   |   |   |   |   |     | 1 S |
| 27       | V |   |   |   |   |   |   |   |   |   |   |   |   |   |   |   |   |   |   |   |     | 2 V |
| 28       | R |   |   |   |   |   |   |   |   |   |   |   |   |   |   |   |   |   |   |   |     | 1 R |
| 29       | D |   |   |   |   |   |   |   |   |   |   |   |   |   |   |   |   |   |   |   |     | 1 D |
| 30       | L |   |   |   |   |   |   |   |   |   |   |   |   |   |   |   |   |   |   |   |     | 1 L |
| 31       | L |   |   |   |   |   |   |   |   |   |   |   |   |   |   |   |   |   |   |   |     | 1 L |
| 32       | D |   |   |   |   |   |   |   |   |   |   |   |   |   |   |   |   |   |   |   |     | 1 D |
| 33       | T |   |   |   |   |   |   |   |   |   |   |   |   |   |   |   |   |   |   |   |     | 1 T |
| 34       | A |   |   |   |   |   |   |   |   |   |   |   |   |   |   |   |   |   |   |   |     | 1 A |
| 35       | S |   |   |   |   |   |   |   |   |   |   |   |   |   |   |   |   |   |   |   |     | 3 S |
| 36       | A |   |   |   |   |   |   |   |   |   |   |   |   |   |   |   |   |   |   |   |     | 1 A |
| 37       | L |   |   |   |   |   |   |   |   |   |   |   |   |   |   |   |   |   |   |   |     | 1 L |
| 38       | Y |   |   |   |   |   |   |   |   |   |   |   |   |   |   |   |   |   |   |   |     | 3 Y |
| 39       | R |   |   |   |   |   |   |   |   |   |   |   |   |   |   |   |   |   |   |   |     | 1 R |
| 40       | E |   |   |   |   |   |   |   |   |   |   |   |   |   |   |   |   |   |   |   |     | 2 E |
| 41       | A |   |   |   |   |   |   |   |   |   |   |   |   |   |   |   |   |   |   |   |     | 1 A |
| 42       | L |   |   |   |   |   |   |   |   |   |   |   |   |   |   |   |   |   |   |   |     | 1 L |
| 43       | E |   |   |   |   |   |   |   |   |   |   |   |   |   |   |   |   |   |   |   |     | 1 E |
| 44       | S |   |   |   |   |   |   |   |   |   |   |   |   |   |   |   |   |   |   |   |     | 1 S |
| 45       | P |   |   |   |   |   |   |   |   |   |   |   |   |   |   |   |   |   |   |   |     | 1 P |
| 46       | E |   |   |   |   |   |   |   |   |   |   |   |   |   |   |   |   |   |   |   |     | 1 E |
| 47       | H |   |   |   |   |   |   |   |   |   |   |   |   |   |   |   |   |   |   |   |     | 1 H |
| 48       | C |   |   |   |   |   |   |   |   |   |   |   |   |   |   |   |   |   |   |   |     | 1 C |
| 49       | S |   |   |   |   |   |   |   |   |   |   |   |   |   |   |   |   |   |   |   |     | 2 S |
| 50       | P |   |   |   |   |   |   |   |   |   |   |   |   |   |   |   |   |   |   |   |     | 1 P |
| 51       | H |   |   |   |   |   |   |   |   |   |   |   |   |   |   |   |   |   |   |   |     | 2 H |
| 52       | H |   |   |   |   |   |   |   |   |   |   |   |   |   |   |   |   |   |   |   |     | 1 H |
| 53       | T |   |   |   |   |   |   |   |   |   |   |   |   |   |   |   |   |   |   |   |     | 1 T |
| 54       | A |   |   |   |   |   |   |   |   |   |   |   |   |   |   |   |   |   |   |   |     | 1 A |
| 55       | L |   |   |   |   |   |   |   |   |   |   |   |   |   |   |   |   |   |   |   |     | 1 L |
| 56       | R |   |   |   |   |   |   |   |   |   |   |   |   |   |   |   |   |   |   |   |     | 1 R |
| 57       | Q |   |   |   |   |   |   |   |   |   |   |   |   |   |   |   |   |   |   |   |     | 1 Q |
| 58       | A |   |   |   |   |   |   |   |   |   |   |   |   |   |   |   |   |   |   |   |     | 1 A |
| 59       | I |   |   |   |   |   |   |   |   |   |   |   |   |   |   |   |   |   |   |   |     | 2 I |
| 60       | L |   |   |   |   |   |   |   |   |   |   |   |   |   |   |   |   |   |   |   |     | 2 L |
| 61       | C |   |   |   |   |   |   |   |   |   |   |   |   |   |   |   |   |   |   |   |     | 1 C |
| 62       | W |   |   |   |   |   |   |   |   |   |   |   |   |   |   |   |   |   |   |   |     | 1 W |
| 63       | G |   |   |   |   |   |   |   |   |   |   |   |   |   |   |   |   |   |   |   |     | 2 G |
| 64       | E |   |   |   |   |   |   |   |   |   |   |   |   |   |   |   |   |   |   |   |     | 2 E |
| 65       | L |   |   |   |   |   |   |   |   |   |   |   |   |   |   |   |   |   |   |   |     | 1 L |
| 66       | M |   |   |   |   |   |   |   |   |   |   |   |   |   |   |   |   |   |   |   |     | 1 M |
| 67       | T |   |   |   |   |   |   |   |   |   |   |   |   |   |   |   |   |   |   |   |     | 3 T |
| 68       | L |   |   |   |   |   |   |   |   |   |   |   |   |   |   |   |   |   |   |   |     | 1 L |
| 69       | A |   |   |   |   |   |   |   |   |   |   |   |   |   |   |   |   |   |   |   |     | 1 A |
| 70       | T |   |   |   |   |   |   |   |   |   |   |   |   |   |   |   |   |   |   |   |     | 2 T |
| 71       | W |   |   |   |   |   |   |   |   |   |   |   |   |   |   |   |   |   |   |   |     | 1 W |
| 72       | V |   |   |   |   |   |   |   |   |   |   |   |   |   |   |   |   |   |   |   |     | 1 V |
| 73       | G |   |   |   |   |   |   |   |   |   |   |   |   |   |   |   |   |   |   |   |     | 1 G |
| 74       | S |   |   |   |   |   |   |   |   |   |   |   |   |   |   |   |   |   |   |   |     | 6 S |
| 75       | N |   |   |   |   |   |   |   |   |   |   |   |   |   |   |   |   |   |   |   |     | 1 N |
| 76       | L |   |   |   |   |   |   |   |   |   |   |   |   |   |   |   |   |   |   |   |     | 1 L |
| 77       | E |   |   |   |   |   |   |   |   |   |   |   |   |   |   |   |   |   |   |   |     | 3 E |
| 78       | D |   |   |   |   |   |   |   |   |   |   |   |   |   |   |   |   |   |   |   |     | 1 D |
| 79       | P |   |   |   |   |   |   |   |   |   |   |   |   |   |   |   |   |   |   |   |     | 2 P |
| 80       | A |   |   |   |   |   |   |   |   |   |   |   |   |   |   |   |   |   |   |   |     | 5 A |
| 81       | S |   |   |   |   |   |   |   |   |   |   |   |   |   |   |   |   |   |   |   |     | 2 S |
| 82       | R |   |   |   |   |   |   |   |   |   |   |   |   |   |   |   |   |   |   |   |     | 1 R |
| 83       | D |   |   |   |   |   |   |   |   |   |   |   |   |   |   |   |   |   |   |   |     | 2 D |
| 84       | L |   |   |   |   |   |   |   |   |   |   |   |   |   |   |   |   |   |   |   |     | 2 L |
| 85       | V |   |   |   |   |   |   |   |   |   |   |   |   |   |   |   |   |   |   |   |     | 1 V |
| 86       | V |   |   |   |   |   |   |   |   |   |   |   |   |   |   |   |   |   |   |   |     | 1 V |
| 87       | S |   |   |   |   |   |   |   |   |   |   |   |   |   |   |   |   |   |   |   |     | 3 S |
| 88       | Y |   |   |   |   |   |   |   |   |   |   |   |   |   |   |   |   |   |   |   |     | 1 Y |
| 89       | V |   |   |   |   |   |   |   |   |   |   |   |   |   |   |   |   |   |   |   |     | 1 V |
| 90       | N |   |   |   |   |   |   |   |   |   |   |   |   |   |   |   |   |   |   |   |     | 1 N |
| 91       | T |   |   |   |   |   |   |   |   |   |   |   |   |   |   |   |   |   |   |   |     | 4 T |
| 92       | N |   |   |   |   |   |   |   |   |   |   |   |   |   |   |   |   |   |   |   |     | 3 N |

Table I Amino acid polymorphisms along the HBVc sequence

The consensus sequence along HBVc is shown down the left and right two columns. The 20 amino acids present in sequence are shown along the top. Black squares represent each occasion that a particular amino acid is found at that position in the sequence with a frequency greater than 1%. The total diversity at each position is shown in the column labeled SUM. Grey represent invariant positions. Blue represent positions at which two alternative amino acids are found. Orange represent positions at which three and red four or greater alternative amino acids are found. X represent gaps in consensus sequence.
